# 1 From bud formation to flowering: transcriptomic state defines the cherry developmental phases 2 of sweet cherry bud dormancy

3

4 Noémie Vimont<sup>1,2,3</sup>, Mathieu Fouché<sup>1</sup>, José Antonio Campoy<sup>4,5,6</sup>, Meixuezi Tong<sup>3</sup>, Mustapha Arkoun<sup>2</sup>,  
5 Jean-Claude Yvin<sup>2</sup>, Philip A. Wigge<sup>3</sup>, Elisabeth Dirlewanger<sup>1</sup>, Sandra Cortijo<sup>3#</sup>, Bénédicte Wenden<sup>1#</sup>

6

7 <sup>1</sup>UMR 1332 BFP, INRA, Univ. Bordeaux, 33882 Villenave d'Ornon, Cedex France; <sup>2</sup>Agro Innovation International - Centre Mondial  
8 d'Innovation - Groupe Roullier, 35400 St Malo, France; <sup>3</sup>The Sainsbury Laboratory, University of Cambridge, Cambridge CB2 1LR,  
9 United Kingdom; <sup>4</sup> Universidad Politécnica de Cartagena, Cartagena, Spain; <sup>5</sup> Universidad de Murcia, Murcia, Spain; <sup>6</sup> Current address:  
10 Department of Plant Developmental Biology, Max Planck Institute for Plant Breeding Research, 50829 Cologne, Germany

11 #Corresponding authors: [sandra.cortijo@slcu.cam.ac.uk](mailto:sandra.cortijo@slcu.cam.ac.uk); [benedicte.wenden@inra.fr](mailto:benedicte.wenden@inra.fr)

12

## 13 SUMMARY

14

- 15 ● Bud dormancy is a crucial stage in perennial trees and allows survival over winter to ensure  
16 optimal flowering and fruit production. Recent work highlighted physiological and molecular  
17 events occurring during bud dormancy in trees and we aimed to further explore the global  
18 transcriptional changes happening throughout dormancy progression.
- 19 ● Using next-generation sequencing and modelling, we conducted an in-depth transcriptomic  
20 analysis for all stages of flower buds in sweet cherry (*Prunus avium* L.) cultivars displaying  
21 contrasted stages of bud dormancy.
- 22 ● We observed that buds in organogenesis, paradormancy, endodormancy and ecodormancy  
23 stages are characterised by specific transcriptional states, associated with different pathways.  
24 We further identified that endodormancy can be separated in several phases based on the  
25 transcriptomic state. We also found that transcriptional profiles of just seven genes are enough  
26 to predict the main cherry tree flower bud dormancy stages.
- 27 ● Our results indicate that transcriptional changes happening during dormancy are robust and  
28 conserved between different sweet cherry cultivars. Our work also sets the stage for the  
29 development of a fast and cost effective diagnostic tool to molecularly define the flower bud  
30 stages in cherry trees.

31

32 **KEY WORDS:** Transcriptomic, RNA sequencing, time course, *Prunus avium* L., prediction, seasonal  
33 timing

34

35

## 36 INTRODUCTION

37

38 Temperate trees face a wide range of environmental conditions including highly contrasted  
39 seasonal changes. Among the strategies to enhance survival under unfavourable climatic conditions,  
40 bud dormancy is crucial for perennial plants since its progression over winter is determinant for  
41 optimal growth, flowering and fruit production during the subsequent season. Bud dormancy has long  
42 been compared to an unresponsive physiological phase, in which metabolic processes within the buds  
43 are halted by cold temperature. However, several studies have shown that bud dormancy progression  
44 can be affected in a complex way by temperature and photoperiod (Heide & Prestrud, 2005; Allona *et*  
45 *al.*, 2008; Olsen, 2010; Cooke *et al.*, 2012; Maurya *et al.*, 2018). Bud dormancy has traditionally been  
46 separated into three main phases: (i) paradormancy, also named “summer dormancy” (Cline &  
47 Depping, 1999); (ii) endodormancy, mostly triggered by internal factors; and (iii) ecodormancy,  
48 controlled by external factors (Lang *et al.*, 1987; Considine & Considine, 2016). Progression through  
49 endodormancy requires cold accumulation whereas warmer temperatures, i.e. heat accumulation, drive  
50 the competence to resume growth over the ecodormancy phase. Dormancy is thus highly dependent  
51 on external temperatures, and changes in seasonal timing of bud break and blooming have been  
52 reported in relation with global warming. Notably, advances in bud break and blooming dates in spring  
53 have been observed in the northern hemisphere, thus increasing the risk of late frost damages (Badeck  
54 *et al.*, 2004; Menzel *et al.*, 2006; Vitasse *et al.*, 2014; Fu *et al.*, 2015; Bigler & Bugmann, 2018) while  
55 insufficient cold accumulation during winter may lead to incomplete dormancy release associated with  
56 bud break delay and low bud break rate (Erez, 2000; Atkinson *et al.*, 2013). These phenological  
57 changes directly impact the production of fruit crops, leading to large potential economic losses  
58 (Snyder & de Melo-abreu, 2005). Consequently, it becomes urgent to acquire a better understanding  
59 of bud responses to temperature stimuli in the context of climate change in order to tackle fruit losses  
60 and anticipate future production changes.

61 In the recent years, an increasing number of studies have investigated the physiological and molecular  
62 mechanisms of bud dormancy transitions in perennials using RNA sequencing technology, thereby  
63 giving a new insight into potential pathways involved in dormancy. The results suggest that the  
64 transitions between the three main bud dormancy phases (para-, endo- and eco- dormancy) are  
65 mediated by pathways related to phytohormones (Zhong *et al.*, 2013; Chao *et al.*, 2017; Khalil-Ur-  
66 Rehman *et al.*, 2017; Zhang *et al.*, 2018), carbohydrates (Min *et al.*, 2017; Zhang *et al.*, 2018),  
67 temperature (Ueno *et al.*, 2013; Paul *et al.*, 2014), photoperiod (Lesur *et al.*, 2015), reactive oxygen  
68 species (Takemura *et al.*, 2015; Zhu *et al.*, 2015), water deprivation (Lesur *et al.*, 2015), cold  
69 acclimation and epigenetic regulation (Kumar *et al.*, 2016). Owing to these studies, a better

70 understanding of bud dormancy has been established in different perennial species (see for example,  
71 the recent reviews (Beauvieux *et al.*, 2018; Lloret *et al.*, 2018; Falavigna *et al.*, 2019). However we  
72 are still missing a fine-resolution temporal understanding of transcriptomic changes happening over  
73 the entire bud development, from bud organogenesis to bud break.

74 Indeed, the small number of sampling dates in existing studies seems to be insufficient to capture all  
75 the information about changes occurring throughout the dormancy cycle as it most likely corresponds  
76 to a chain of biological events rather than an on/off mechanism. Many unresolved questions remain:  
77 What are the fine-resolution dynamics of gene expression related to dormancy? Are specific sets of  
78 genes associated with dormancy stages? Since the timing for the response to environmental cues is  
79 cultivar-dependant (Campoy *et al.*, 2011; Wenden *et al.*, 2017), are transcriptomic profiles during  
80 dormancy different in cultivars with contrasted flowering date?

81 To explore these mechanisms, we conducted a transcriptomic analysis of sweet cherry (*Prunus*  
82 *avium* L.) flower buds from bud organogenesis until the end of bud dormancy using next-generation  
83 sequencing. Sweet cherry is a perennial species highly sensitive to temperature (Heide, 2008) and we  
84 focused on three sweet cherry cultivars displaying contrasted flowering dates and response to  
85 environmental conditions. We carried out a fine-resolution time-course spanning the entire bud  
86 development, from flower organogenesis in July to spring in the following year when flowering occurs,  
87 encompassing para-, enco- and ecodormancy phases. Our results indicate that transcriptional changes  
88 happening during dormancy are conserved between different sweet cherry cultivars, opening the way  
89 to the identification of key factors involved in the progression through bud dormancy.

90

## 91 **MATERIAL AND METHODS**

92

### 93 ***Plant material***

94 Branches and flower buds were collected from four different sweet cherry cultivars with contrasted  
95 flowering dates: ‘Cristobalina’, ‘Garnet’, ‘Regina’ and ‘Fertard’, which display extra-early, early, late  
96 and very late flowering dates, respectively. ‘Cristobalina’, ‘Garnet’, ‘Regina’ trees were grown in an  
97 orchard located at the Fruit Experimental Unit of INRA in Bourran (South West of France, 44° 19' 56"  
98 N, 0° 24' 47" E), under the same agricultural practices. ‘Fertard’ trees were grown in a nearby orchard  
99 at the Fruit Experimental Unit of INRA in Toulence, near Bordeaux (48° 51' 46" N, 2° 17' 15" E).  
100 During the first sampling season (2015/2016), ten or eleven dates spanning the entire period from  
101 flower bud organogenesis (July 2015) to bud break (March 2016) were chosen for RNA sequencing  
102 (Table S1; Fig. 1a), while bud tissues from ‘Fertard’ were sampled in 2015/2016 (12 dates) and  
103 2017/2018 (7 dates) for validation by qRT-PCR (Table S1). For each date, flower buds were sampled

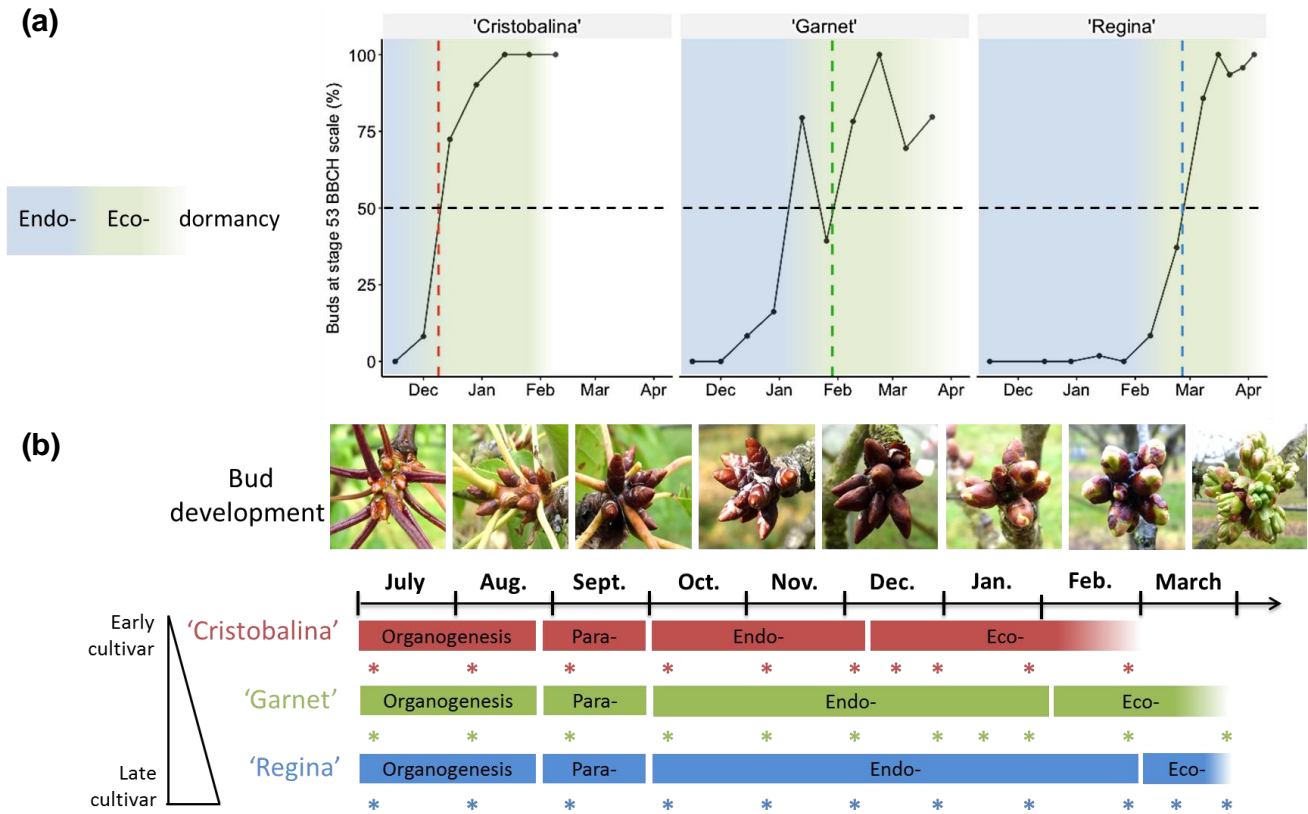

**Fig. 1 Dormancy status under environmental conditions and RNA-seq sampling dates**

(a) Evaluation of bud break percentage under forcing conditions was carried out for three sweet cherry cultivars displaying different flowering dates in 'Cristobalina', 'Garnet' and 'Regina' for the early, medium and late cultivar, respectively. The coloured dotted line corresponds to the dormancy release date, estimated at 50% of buds at BBCH stage 53 (Meier, 2001). (b) Sampling time points for the transcriptomic analysis are represented by coloured stars. Red for 'Cristobalina', green for 'Garnet' and blue for 'Regina'.

104 from different trees, each tree corresponding to a biological replicate. Upon harvesting, buds were  
 105 flash frozen in liquid nitrogen and stored at  $-80^{\circ}\text{C}$  prior to performing RNA-seq.

106

### 107 *Measurements of bud break and estimation of the dormancy release date*

108 For the two sampling seasons, 2015/2016 and 2017/2018, three branches bearing floral buds were  
 109 randomly chosen fortnightly from 'Cristobalina', 'Garnet', 'Regina' and 'Fertard' trees, between  
 110 November and flowering time (March-April). Branches were incubated in water pots placed under  
 111 forcing conditions in a growth chamber ( $25^{\circ}\text{C}$ , 16h light/ 8h dark, 60-70% humidity). The water was  
 112 replaced every 3-4 days. After ten days under forcing conditions, the total number of flower buds that  
 113 reached the BBCH stage 53 (Meier, 2001; Fadón *et al.*, 2015) was recorded. The date of dormancy  
 114 release was estimated as the date when the percentage of buds at BBCH stage 53 was above 50% after  
 115 ten days under forcing conditions (Fig. 1a).

116

117 ***RNA extraction and library preparation***

118 Total RNA was extracted from 50-60 mg of frozen and pulverised flower buds using RNeasy Plant  
119 Mini kit (Qiagen) with minor modification: 1.5% PVP-40 was added in the extraction buffer RLT.  
120 RNA quality was evaluated using Tapestation 4200 (Agilent Genomics). Library preparation was  
121 performed on 1 µg of high quality RNA (RNA integrity number equivalent superior or equivalent to  
122 8.5) using the TruSeq Stranded mRNA Library Prep Kit High Throughput (Illumina cat. no. RS-122-  
123 2103) for ‘Cristobalina’, ‘Garnet’ and ‘Regina’ cultivars. DNA quality from libraries was evaluated  
124 using Tapestation 4200. The libraries were sequenced on a NextSeq500 (Illumina), at the Sainsbury  
125 Laboratory Cambridge University (SLCU), using paired-end sequencing of 75 bp in length.

126

127 ***Mapping and differential expression analysis***

128 The raw reads obtained from the sequencing were analysed using several publicly available software  
129 and in-house scripts. The quality of reads was assessed using FastQC  
130 ([www.bioinformatics.babraham.ac.uk/projects/fastqc/](http://www.bioinformatics.babraham.ac.uk/projects/fastqc/)) and possible adaptor contaminations and low  
131 quality trailing sequences were removed using Trimmomatic (Bolger *et al.*, 2014). Trimmed reads  
132 were mapped to the peach (*Prunus persica* (L) Batsch) reference genome v.2 (Verde *et al.*, 2017) using  
133 Tophat (Trapnell *et al.*, 2009). Possible optical duplicates were removed using Picard tools  
134 (<https://github.com/broadinstitute/picard>). The total number of mapped reads of each samples are  
135 given in Table S2. For each gene, raw read counts and TPM (Transcripts Per Million) numbers were  
136 calculated (Wagner, 2003).

137 We performed a differential expression analysis on data obtained from the ‘Garnet’ samples. First,  
138 data were filtered by removing lowly expressed genes (average read count < 3), genes not expressed  
139 in most samples (read counts = 0 in more than 75% of the samples) and genes presenting little ratio  
140 change (coefficient of variation < 0.3). Then, differentially expressed genes (DEGs) between bud  
141 stages (organogenesis, paradormancy, endodormancy, dormancy breaking, ecodormancy, see Table  
142 S1) were assessed using DEseq2 R Bioconductor package (Love *et al.*, 2014), in the statistical software  
143 R (R Core Team 2018), on filtered data. Genes with an adjusted *p-value* (*padj*) < 0.05 were assigned  
144 as DEGs (Table S3). To enable researchers to access this resource, we have created a graphical web  
145 interface to allow easy visualisation of transcriptional profiles throughout flower bud dormancy in the  
146 three cultivars for genes of interest ([bwenden.shinyapps.io/DorPatterns/](http://bwenden.shinyapps.io/DorPatterns/)).

147

148 ***Principal component analyses and hierarchical clustering***

149 Distances between the DEGs expression patterns over the time course were calculated based on  
150 Pearson’s correlation on ‘Garnet’ TPM values. We applied a hierarchical clustering analysis on the

151 distance matrix to define ten clusters (Table S3). For expression patterns representation, we normalized  
152 the data using *z-score* for each gene:

$$153 \quad z \text{ score} = \frac{(TPM_{ij} - mean_i)}{Standard \ Deviation}$$

154 where  $TPM_{ij}$  is the TPM value of the gene  $i$  in the sample  $j$ ,  $mean_i$  and  $standard \ deviation_i$  are the *mean*  
155 and *standard deviation* of the TPM values for the gene  $i$  over all samples.

156 Principal component analyses (PCA) were performed on TPM values from different datasets using the  
157 *prcomp* function from R.

158 For each cluster, using data for ‘Garnet’, ‘Regina’ and ‘Cristobalina’, mean expression pattern was  
159 calculated as the mean *z-score* value for all genes belonging to the cluster. We then calculated the  
160 Pearson’s correlation between the *z-score* values for each gene and the mean *z-score* for each cluster.  
161 We defined the marker genes as genes with the highest correlation values, i.e. genes that represent the  
162 best the average pattern of the clusters. Keeping in mind that the marker genes should be easy to  
163 handle, we then selected the optimal marker genes displaying high expression levels while not  
164 belonging to extended protein families.

165

### 166 ***Motif and transcription factor targets enrichment analysis***

167 We performed enrichment analysis on the DEG in the different clusters for transcription factor targets  
168 genes and target motifs.

169 Motif discovery on the DEG set was performed using Find Individual Motif occurrences (FIMO)  
170 (Grant *et al.*, 2011). Motif list available for peach was obtained from PlantTFDB 4.0 (Jin *et al.*, 2017).

171 To calculate the overrepresentation of motifs, DEGs were grouped by motif (grouping several genes  
172 and transcripts in which the motif was found). Overrepresentation of motifs was performed using  
173 hypergeometric tests using Hypergeometric {stats} available in R. Comparison was performed for the  
174 number of appearances of a motif in one cluster against the number of appearances on the overall set  
175 of DEG. As multiple testing implies the increment of false positives, *p-values* obtained were corrected  
176 using False Discovery Rate (Benjamini & Hochberg, 1995) correction method using `p.adjust{stats}`  
177 function available in R.

178 A list of predicted regulation between transcription factors and target genes is available for peach in  
179 PlantTFDB (Jin *et al.*, 2017). We collected the list and used it to analyse the overrepresentation of  
180 genes targeted by TF, using Hypergeometric {stats} available in R, comparing the number of  
181 appearances of a gene controlled by one TF in one cluster against the number of appearances on the  
182 overall set of DEG. *p-values* obtained were corrected using a false discovery rate as described above.

183 Predicted gene homology to *Arabidopsis thaliana* and functions were retrieved from the data files

184 available for *Prunus persica* (GDR,  
185 [https://www.rosaceae.org/species/prunus\\_persica/genome\\_v2.0.a1](https://www.rosaceae.org/species/prunus_persica/genome_v2.0.a1)).

186

### 187 ***GO enrichment analysis***

188 The list for the gene ontology (GO) terms was retrieved from the database resource PlantRegMap (Jin  
189 *et al.*, 2017). Using the topGO package (Alexa & Rahnenführer, 2018), we performed an enrichment  
190 analysis on GO terms for biological processes, cellular components and molecular functions based on  
191 a classic Fisher algorithm. Enriched GO terms were filtered with a *p-value* < 0.005 and the ten GO  
192 terms with the lowest *p-value* were selected for representation.

193

### 194 ***Marker genes qRT-PCR analyses***

195 cDNA was synthesised from 1µg of total RNA using the iscript Reverse Transcriptase Kit (Bio-rad  
196 Cat no 1708891) in 20 µl of final volume. 2 µL of cDNA diluted to a third was used to perform the  
197 qPCR in a 20 µL total reaction volume. qPCRs were performed using a Roche LightCycler 480. Three  
198 biological replicates for each sample were performed. Primers used in this study for qPCR are:

199 *PavCSLG3* F:CCAACCAACAAAGTTGACGA, R:CAACTCCCCCAAAAAGATGA; *PavMEE9*:  
200 F:CTGCAGCTGAACTGGAACAG, R:ACTCATCCATGGCACTCTCC; *PavSRP*:  
201 F:ACAGGATCTGGAAAGCCAAG, R:AGGGTGGCTCTGAAACACAG; *PavTCX2*:  
202 F:CTTCCACAACGCCTTTACG, R:GGCTATGTCTCTCAAACCTTGGA; *PavGHI27*:  
203 F:GCCATTGGTTGTAGGGTTTG, R:ATCCATTGAGCATTGTTG; *PavUDP-GALTI*  
204 F:CAATGTTGCTGGAAACCTCA, R:GTTATTCCACATCCGACAGC; *PavPP2C*  
205 F:CTGTGCCTGAAGTGACACAGA, R:CTGCACTGCTTCTTGATTTG; *PavRPII*  
206 F:TGAAGCATAACCTATGATGATGAAG, R:CTTTGACAGCACCAGTAGATTCC; *PavEFI*  
207 F:CCCTTCGACTTCCACTTCAG, R:CACAAGCATACCAGGCTTCA. Primers were tested for non-specific

208 products previously by separation on 1.5% agarose gel electrophoresis and by sequencing each  
209 amplicon. Real-time data were analysed using custom R scripts.

210

### 211 ***Bud stage predictive modelling***

212 In order to predict the bud stage based on the marker genes transcriptomic data, we used TPM values  
213 for the marker genes to train a multinomial logistic regression. First, all samples were projected into a  
214 2-dimension plan using PCA. The new coordinates were used to train and test the model to predict the  
215 five bud stage categories (function *multinom* from the *nnet* R package, (Ripley & Venables, 2016).  
216 Model accuracy is calculated as the percentage of correct predicted stages in the testing set. In addition,  
217 we tested the model on qRT-PCR data for ‘Fertard’ samples. Relative expression was estimated for

218 each gene in each sample using a cDNA standard curve and normalized by the expression  
219 corresponding to the October sample. We chose the date of October as the reference because it  
220 corresponds to the beginning of dormancy and it was available for all cultivars. For each date, the  
221 mean expression values of the seven marker genes were projected in the PCA 2-dimension plan  
222 calculated for the RNA-seq data and they were tested against the model trained on ‘Cristobalina’,  
223 ‘Garnet’ and ‘Regina’ RNA-seq data.

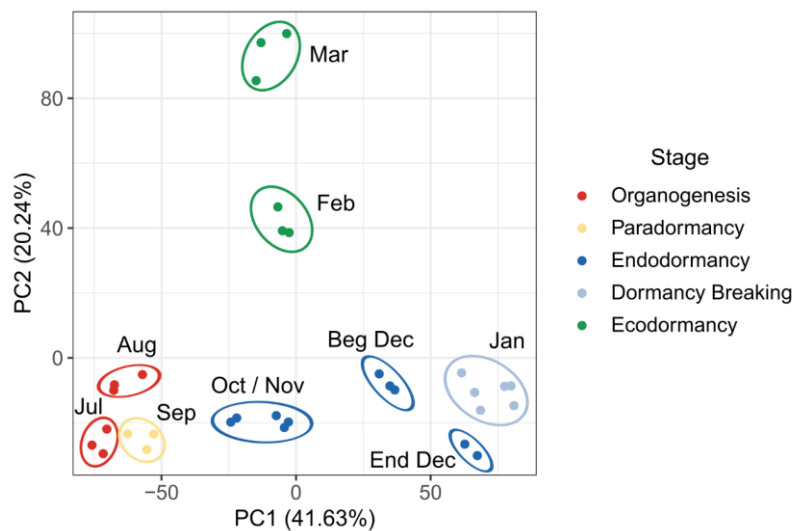

**Fig. 2 Separation of samples by dormancy stage using differentially expressed genes**

The principal component analysis was conducted on the TPM (transcripts per millions reads) values for the differentially expressed genes in the cultivar ‘Garnet’ flower buds, sampled on three trees between July and March.

224

## 225 RESULTS

### 226 Transcriptome accurately captures the dormancy state

227 In order to define transcriptional changes happening over the sweet cherry flower bud  
228 development, we performed a transcriptomic-wide analysis using next-generation sequencing from  
229 bud organogenesis to flowering. According to bud break percentage (Fig. 1a), morphological  
230 observations (Fig. 1b), average temperatures (Fig. S1) and descriptions from Lang *et al.*, (1987), we  
231 assigned five main stages to the early flowering cultivar ‘Garnet’ flower buds samples (Fig. 1b): i)  
232 flower bud organogenesis occurs in July and August, ii) paradormancy corresponds to the period of  
233 growth cessation in September, iii) during the endodormancy phase, initiated in October, buds are  
234 unresponsive to forcing conditions therefore the increasing bud break percentage under forcing  
235 conditions suggests that endodormancy was released on January 29th, 2016, thus corresponding to iv)  
236 dormancy breaking, and v) ecodormancy starting from the estimated dormancy release date until  
237 flowering.

238 We identified 6,683 genes that are differentially expressed (DEGs) between the defined bud  
239 stages for the sweet cherry cultivar ‘Garnet’ (Table S3). When projected into a two-dimensional space  
240 (Principal Component Analysis, PCA), data for these DEGs show that transcriptomes of samples



241 harvested at a given date are projected together (Fig. 2), showing the high quality of the biological  
242 replicates and that different trees are in a very similar transcriptional state at the same date. Very  
243 interestingly, we also observe that flower bud states are clearly separated on the PCA, with the  
244 exception of organogenesis and paradormancy, which are projected together (Fig. 2). The first  
245 dimension of the analysis (PC1) explains 41,63% of the variance and clearly represents the strength of  
246 bud dormancy where samples on the right of the axis are in endodormancy or dormancy breaking  
247 stages. The second dimension of the analysis (PC2) explains 20.24% of the variance and distinguishes  
248 two main phases of the bud development: before and after dormancy breaking. We obtain very similar  
249 results when performing the PCA on all genes (Fig. S2). These results indicate that the transcriptional  
250 state of DEGs accurately captures the dormancy state of flower buds.

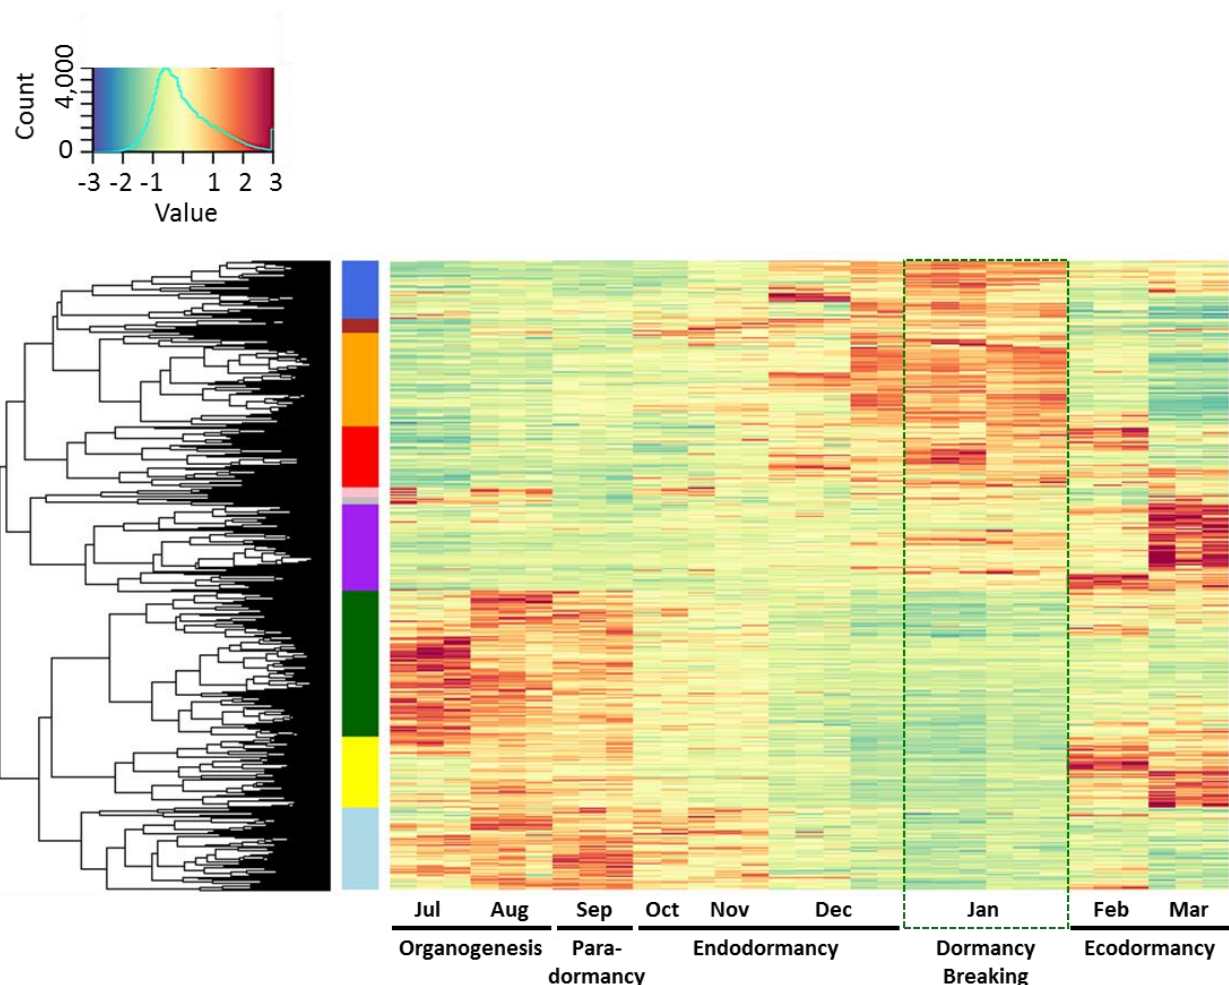

**Fig. 3 Clusters of expression patterns for differentially expressed genes in the sweet cherry cultivar ‘Garnet’**

Heatmap for ‘Garnet’ differentially expressed genes during bud development. Each column corresponds to the gene expression for flower buds from one single tree at a given date. Clusters are ordered based on the chronology of the expression peak (from earliest – July, 1-dark green cluster – to latest – March, 9 and 10). Expression values were normalized and *z-scores* are represented here.

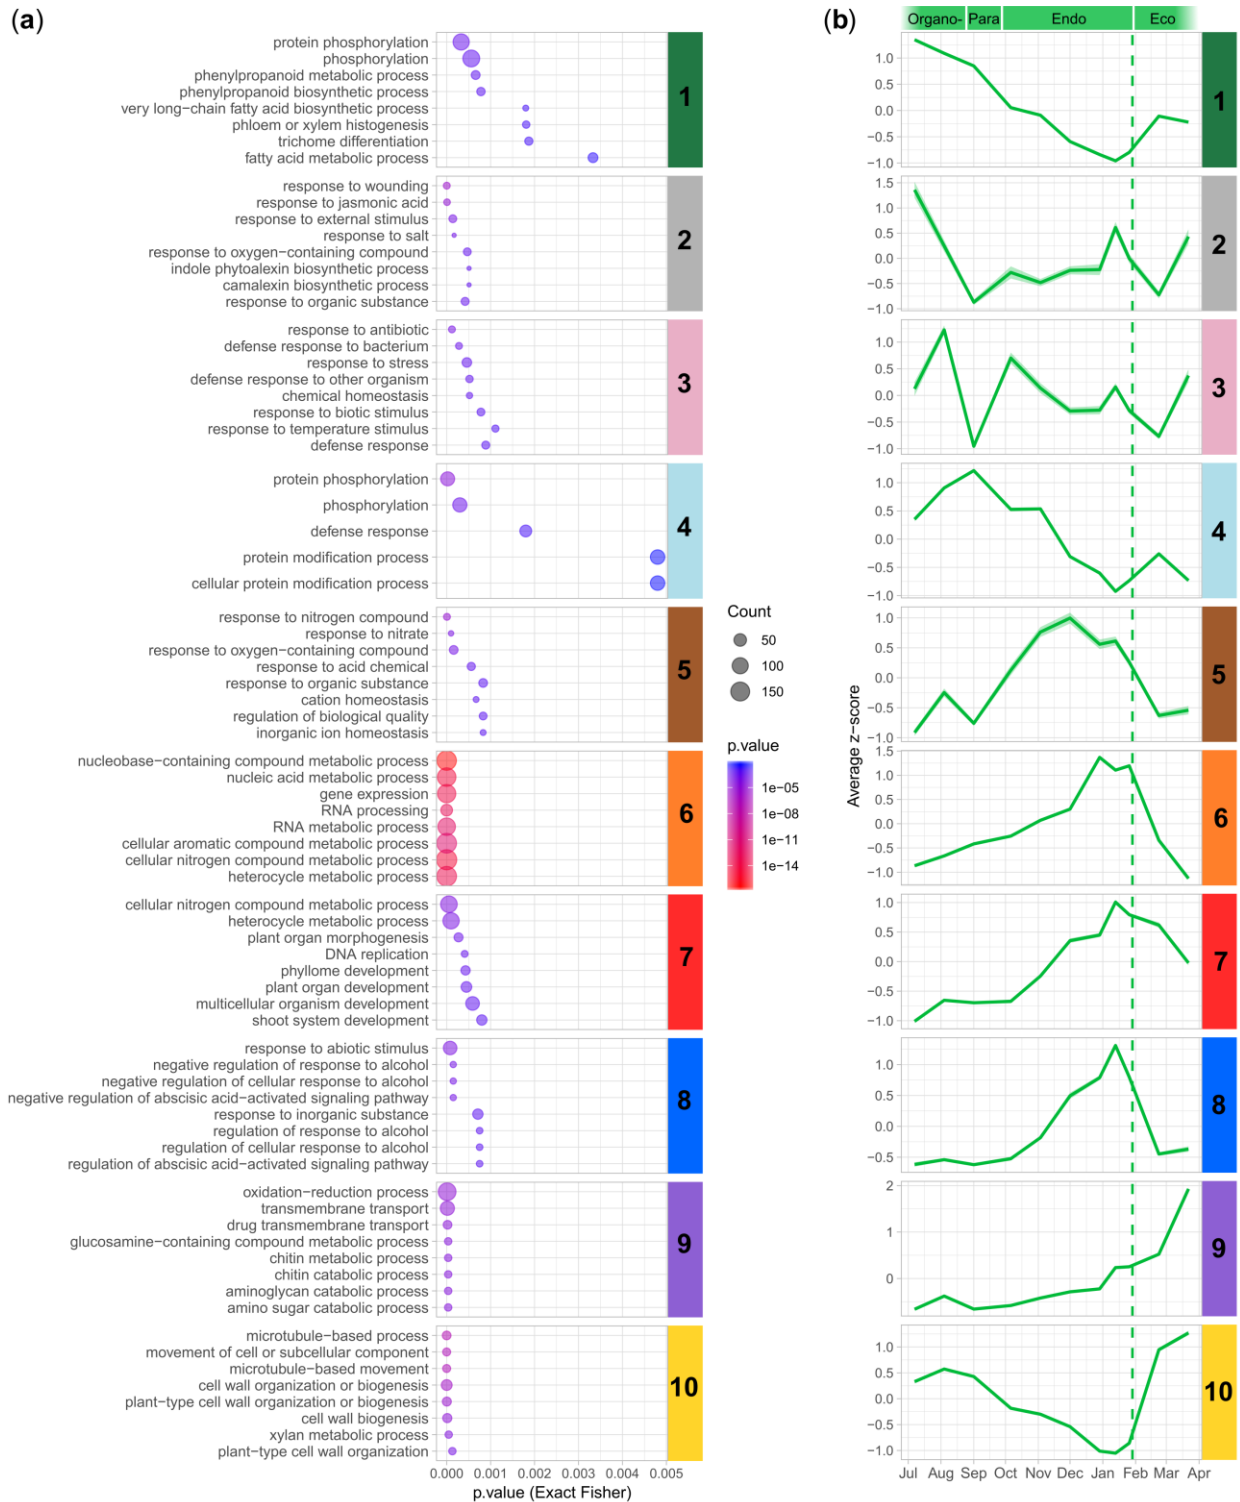

## 252 **Bud stage-dependent transcriptional activation and repression are associated with different** 253 **pathways**

254 We further investigated whether specific genes or signalling pathways could be associated with  
255 the different flower bud stages. Indeed, the expression of genes grouped in ten clusters clearly shows  
256 distinct expression profiles throughout the bud development (Fig. 3). Overall, three main types of  
257 clusters can be discriminated: the ones with a maximum expression level during organogenesis and  
258 paradormancy (cluster 1: 1,549 genes; cluster 2: 70 genes; cluster 3: 113 genes; cluster 4: 884 genes  
259 and cluster 10: 739 genes, Fig. 3), the clusters with a maximum expression level during endodormancy  
260 and around the time of dormancy breaking (cluster 5: 156 genes; cluster 6: 989 genes ; cluster 7: 648  
261 genes and cluster 8: 612 genes, Fig. 3), and finally the clusters with a maximum expression level during  
262 ecodormancy (cluster 9: 924 genes and cluster 10, Fig. 3). This result shows that different groups of  
263 genes are associated with these three main flower bud phases. Interestingly, we also observed that,  
264 during the endodormancy phase, some genes are expressed in October and November then repressed  
265 in December (cluster 4, Fig. 3), whereas another group of genes is expressed in December (clusters 8,  
266 5, 6 and 7, Fig. 3) therefore separating endodormancy in two distinct phases.

267 In order to explore the functions and pathways associated with the gene clusters, we performed  
268 a GO enrichment analysis (Fig. 4, Fig. S3). GO terms associated with the response to stress as well as  
269 biotic and abiotic stimuli were enriched in the clusters 2, 3 and 4, with genes mainly expressed during  
270 organogenesis and paradormancy. During endodormancy (cluster 5), an enrichment for genes involved  
271 in response to nitrate and nitrogen compounds was spotted. On the opposite, at the end of the  
272 endodormancy phase (cluster 6, 7 and 8), we highlighted different enrichments in GO terms linked to  
273 basic metabolisms such as nucleic acid metabolic processes or DNA replication but also to response  
274 to alcohol and abscisic acid. Finally, during ecodormancy, genes in cluster 9 and 10 are enriched in  
275 functions associated with transport, cell wall biogenesis as well as oxidation-reduction processes (Fig.  
276 4, Fig. S3). These results show that different functions and pathways are specific to flower bud  
277 development stages.

278

## 279 **Specific transcription factor target genes are expressed during the main flower bud stages**

280 To better understand the regulation of genes that are expressed at different flower bud stages,  
281 we investigated the TFs with enriched targets (Table 1) as well as the enriched target promoter motifs  
282 (Table S4) in the different gene clusters. Among the genes expressed during the organogenesis and  
283 paradormancy phases (clusters 1, 2, 3 and 4), we observed an enrichment for motifs of several MADS-  
284 box TFs such as AGAMOUS (AG), APETALA3 (AP3) and SEPALLATA3/AGAMOUS-like 9  
285 (SEP3/AGL9) (Table S4), several of them potentially involved in flower organogenesis (Causier *et*

286 *al.*, 2010). On the other hand, for the same clusters, results show an enrichment in MYB-related targets,  
 287 WRKY and ethylene-responsive element (ERF) binding TFs (Table 1, Table S4). Several members of  
 288 these TF families have been shown to participate in the response to abiotic factors. Similarly, we found  
 289 in the cluster 4 target motifs enriched for PavDREB2C (Table S4), potentially involved in the response  
 290 to cold (Lee *et al.*, 2010). Interestingly, we identified an enrichment in the cluster 5 of targets for  
 291 CBF4, and of genes with motifs for several ethylene-responsive element binding TFs such as  
 292 PavDREB2C. We also observed an enrichment in the same cluster for genes with motifs for ABI5  
 293 (Table S4). All these TFs are involved in the response to cold, in agreement with the fact that genes in  
 294 the cluster 5 are expressed during endodormancy.

295

296 **Table 1. Enrichment in transcription factor targets in the different clusters**

|                | Gene Name      | gene id        | Transcription Factor Cluster | Predicted TF family | Arabidopsis homologous                     | Predicted function                               | Enrichment p value | Enrichment adjusted p value |
|----------------|----------------|----------------|------------------------------|---------------------|--------------------------------------------|--------------------------------------------------|--------------------|-----------------------------|
| 1 - Dark green | PavMYB63       | Prupe.4G136300 | 1 - Dark green               | MYB                 | AT1G79180                                  | Myb-related protein                              | 2,1E-05            | 6,7E-03 (**)                |
|                | PavMYB93       | Prupe.6G188300 | 1 - Dark green               | MYB                 | AT1G34670                                  | Myb-related protein                              | 9,0E-04            | 3,2E-02 (*)                 |
|                | PavMYB40       | Prupe.3G299000 | 8 - royal blue               | MYB                 | AT5G14340                                  | Myb-related protein                              | 2,7E-04            | 1,7E-02 (*)                 |
|                | PavMYB17       | Prupe.2G164300 | -                            | MYB                 | AT3G61250                                  | Myb-related protein                              | 6,8E-05            | 7,2E-03 (**)                |
|                | PavMYB94       | Prupe.5G193200 | -                            | MYB                 | AT3G47600                                  | Myb-related protein                              | 9,0E-05            | 7,2E-03 (**)                |
|                | PavMYB60       | Prupe.7G018400 | -                            | MYB                 | AT1G08810                                  | Myb-related protein                              | 7,0E-05            | 7,2E-03 (**)                |
|                | PavMYB61       | Prupe.6G303300 | -                            | MYB                 | AT1G09540                                  | Myb-related protein                              | 4,0E-04            | 2,1E-02 (*)                 |
|                | PavMYB3        | Prupe.1G551400 | -                            | MYB                 | AT1G22640                                  | Myb-related protein                              | 6,0E-04            | 2,8E-02 (*)                 |
|                | PavMYB67       | Prupe.4G126900 | -                            | MYB                 | AT3G12720                                  | Myb-related protein                              | 7,8E-04            | 3,1E-02 (*)                 |
| 2 - grey       | Prupe.1G122800 | -              | CAMTA                        | AT4G16150           | Calmodulin-binding transcription activator | 3,1E-05                                          | 8,0E-03 (**)       |                             |
| 3 - pink       | PavWRKY40      | Prupe.3G098100 | 3 - pink                     | WRKY                | AT1G80840                                  | WRKY transcription factor                        | 8,4E-05            | 1,2E-02 (*)                 |
|                | PavWRKY11      | Prupe.1G122800 | -                            | WRKY                | AT4G31550                                  | WRKY transcription factor                        | 4,7E-04            | 4,5E-02 (*)                 |
| 5 - brown      | PavCBF4        | Prupe.2G289500 | -                            | ERF                 | AT5G51990                                  | Dehydration-responsive element-binding protein   | 2,0E-04            | 5,7E-02                     |
| 6 - orange     | PavERF110      | Prupe.6G165700 | 8 - royal blue               | ERF                 | AT5G50080                                  | Ethylene-responsive transcription factor         | 3,1E-04            | 5,2E-02                     |
|                | PavRVE8        | Prupe.6G242700 | 8 - royal blue               | MYB                 | AT3G09600                                  | Homeodomain-like superfamily protein RVE8        | 4,3E-04            | 5,2E-02                     |
|                | PavRAP2.12     | Prupe.3G032300 | -                            | ERF                 | AT1G53910                                  | Ethylene-responsive transcription factor         | 4,9E-04            | 5,2E-02                     |
| 8 - royal blue | PavRVE1        | Prupe.3G014900 | 6 - orange                   | MYB                 | AT5G17300                                  | Homeodomain-like superfamily protein RVE1        | 1,0E-03            | 3,6E-02 (*)                 |
|                | PavAB15        | Prupe.7G112200 | 7 - red                      | bZIP                | AT2G36270                                  | ABSCISIC ACID-INSENSITIVE 5                      | 6,6E-05            | 7,0E-03 (**)                |
|                | PavABF2        | Prupe.1G434500 | 8 - royal blue               | bZIP                | AT1G45249                                  | abscisic acid responsive elements-binding factor | 2,4E-06            | 7,5E-04 (***)               |
|                | PavAREB3       | Prupe.2G056800 | -                            | bZIP                | AT3G56850                                  | ABA-responsive element binding protein           | 1,4E-05            | 2,2E-03 (**)                |
|                | PavPIL5        | Prupe.8G209100 | -                            | bHLH                | AT2G20180                                  | phytochrome interacting factor 3-like 5          | 2,3E-04            | 1,9E-02 (*)                 |
|                | PavbZIP16      | Prupe.5G027000 | -                            | bZIP                | AT2G35530                                  | basic region/leucine zipper transcription factor | 4,3E-04            | 2,7E-02 (*)                 |
|                | PavSPT         | Prupe.7G131400 | -                            | bHLH                | AT4G36930                                  | Transcription factor SPATULA                     | 5,6E-04            | 3,0E-02 (*)                 |
|                | PavBPE         | Prupe.1G263800 | -                            | bHLH                | AT1G59640                                  | Transcription factor BPE                         | 1,0E-03            | 3,6E-02 (*)                 |
|                | PavPIF4        | Prupe.3G179800 | -                            | bHLH                | AT2G43010                                  | phytochrome interacting factor 4                 | 9,5E-04            | 3,6E-02 (*)                 |
|                | PavGBF3        | Prupe.2G182800 | -                            | bZIP                | AT2G46270                                  | G-box binding factor 3                           | 1,1E-03            | 3,6E-02 (*)                 |
| 9 - purple     | PavWRKY50      | Prupe.1G407500 | -                            | WRKY                | AT5G26170                                  | WRKY transcription factor                        | 1,1E-04            | 1,8E-02 (*)                 |
|                | PavWRKY1       | Prupe.3G202000 | -                            | WRKY                | AT2G04880                                  | WRKY transcription factor                        | 5,8E-05            | 1,8E-02 (*)                 |
| 10 - yellow    | PavMYB14       | Prupe.1G039200 | 5 - brown                    | MYB                 | AT2G31180                                  | Myb-related protein                              | 1,6E-04            | 3,9E-02 (*)                 |
|                | PavNAC70       | Prupe.8G002500 | -                            | NAC                 | AT4G10350                                  | NAC domain containing protein                    | 2,4E-04            | 3,9E-02 (*)                 |

297

298 Based on the gene regulation information available for peach in PlantTFDB (Jin *et al.*, 2017), overrepresentation of genes  
 299 targeted by transcription factors was performed using hypergeometric tests. *p-values* obtained were corrected using a false  
 300 discovery rate: (\*\*\*) : adj. p-value < 0.001; (\*\*): adj. p-value < 0.01; (\*): adj. p-value < 0.05.

301

302 Genes belonging to the clusters 6, 7 and 8 are highly expressed during deep dormancy and we  
 303 found targets and target motifs for many TFs involved in the response to abiotic stresses. For example,  
 304 we found motifs enriched in the cluster 7 for many TFs of the C2H2 family, which is involved in the  
 305 response of wide spectrum of stress conditions, such as extreme temperatures, salinity, drought or  
 306 oxidative stress (Table S4, (Kielbowicz-Matuk, 2012; Liu *et al.*, 2015). Similarly, in the cluster 8, we  
 307 also identified an enrichment in targets and motifs of many genes involved in the response to ABA  
 308 and to abiotic stimulus, such as *PavABF2*, *PavAREB3*, *PavABI5* and *PavDREB2C* (Koornneef *et al.*,

309 1998; Lee *et al.*, 2010). We also observe in this same cluster an enrichment for targets of TFs involved  
310 in the response to light and temperature, such as *PavPIL5*, *PavSPT*, *PavRVE1* and *PavPIF4* (Table 1,  
311 Penfield *et al.*, 2005; Olsen, 2010; Franklin *et al.*, 2011; Dođramacı *et al.*, 2014). Interestingly, we  
312 found that among the TFs with enriched targets in the clusters, only ten display changes in expression  
313 during flower bud development (Table 1, Table S4, Fig. S4), including *PavABF2*, *PavABI5* and  
314 *PavRVE1*. Expression profiles for these three genes are very similar, and are also similar to their target  
315 genes, with a peak of expression around the estimated dormancy release date, indicating that these TFs  
316 are positively regulating their targets (Fig. S4).

317 Finally, genes belonging to the cluster 10 are expressed during ecodormancy and we find an  
318 enrichment for targets of PavMYB14 (Table 1). Expression profiles suggest that PavMYB14 represses  
319 expression of its target genes during endodormancy (Fig. S4), consistently with the functions of  
320 *Arabidopsis thaliana* MYB14 that negatively regulates the response to cold (Chen *et al.*, 2013).  
321 Overall, these results show that a small number of TFs specifically regulate target genes during the  
322 different flower bud stages.

323

### 324 **Expression patterns highlight bud dormancy similarities and disparities between three cherry** 325 **tree cultivars**

326 Since temperature changes and progression through the flower bud stages are happening  
327 synchronously, it is challenging to discriminate transcriptional changes that are mainly associated with  
328 one or the other. In this context, we also analysed the transcriptome of two other sweet cherry cultivars:  
329 ‘Cristobalina’, characterized by very early flowering dates, and ‘Regina’, with a late flowering time.  
330 The span between flowering periods for the three cultivars is also found in the transition between  
331 endodormancy and ecodormancy since ten weeks separated the estimated dates of dormancy release  
332 between the cultivars: 9th December 2015 for ‘Cristobalina’, 29th January 2016 for ‘Garnet’ and 26th  
333 February 2016 for ‘Regina’ (Fig. 1a). The transition from organogenesis to paradormancy is not well  
334 documented and many studies suggest that endodormancy onset is under the strict control of  
335 environment. Therefore, we considered that these two transitions occurred at the same time in all three  
336 cultivars. However, the two months and half difference in the date of transition from endodormancy  
337 to ecodormancy between the cultivars allow us to look for transcriptional changes associated with this  
338 transition independently of environmental conditions. To do so, we compared the expression patterns  
339 of the previously identified DEGs between the three contrasted cultivars throughout flower bud stages  
340 (Fig. 1b). When projected into a PCA 2-components plane, all samples harvested from buds at the  
341 same stage cluster together, whatever the cultivar (Fig. 5), suggesting that the stage of the bud has  
342 more impact on the transcriptional state than time or external conditions.

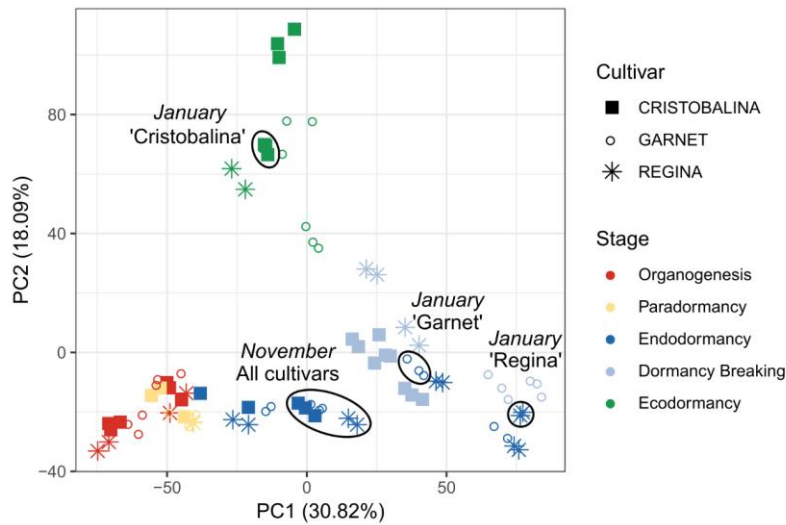

**Fig. 5 Separation of samples by dormancy stage and cultivar using differentially expressed genes**

The principal component analysis was conducted on the TPM (transcripts per millions reads) values for the differentially expressed genes in the flower buds of the cultivars ‘Cristobalina’ (filled squares), ‘Garnet’ (empty circles) and ‘Regina’ (stars). Each point corresponds to one sampling time in a single tree.

343

344 To go further, we compared transcriptional profiles throughout the time course in all cultivars.  
345 For this we analysed the expression profiles in each cultivar for the clusters previously identified for  
346 the cultivar ‘Garnet’ (Fig. 6). Due to the low number of genes, clusters 2, 3 were not further studied in  
347 the three cultivars and we considered that the expression patterns for the genes in cluster 6 were  
348 redundant with clusters 5 and 7 therefore we simplified the analysis on seven clusters. In general,  
349 averaged expression profiles for all clusters are very similar in all three varieties, with the peak of  
350 expression happening at a similar period of the year. However, we can distinguish two main phases  
351 according to similarities or disparities between cultivars. First, averaged expression profiles are almost  
352 similar in all cultivars between July and November. This is especially the case for clusters 1, 4, 7, 8  
353 and 9. On the other hand, we can observe a temporal shift in the peak of expression between varieties  
354 from December onward for genes in clusters 1, 5, 8 and 10. Indeed, in these clusters, the peak or drop  
355 in expression happens earlier in ‘Cristobalina’, and slightly later in ‘Regina’ compared to ‘Garnet’  
356 (Fig. 6), in correlation with their dormancy release dates. These results seem to confirm that the  
357 organogenesis and paradormancy phases occur concomitantly in the three cultivars while temporal  
358 shifts between cultivars are observed after endodormancy onset. Therefore, similarly to the PCA  
359 results (Fig. 5), the expression profile of these genes is more associated with the flower bud stage than  
360 with external environmental conditions.

361

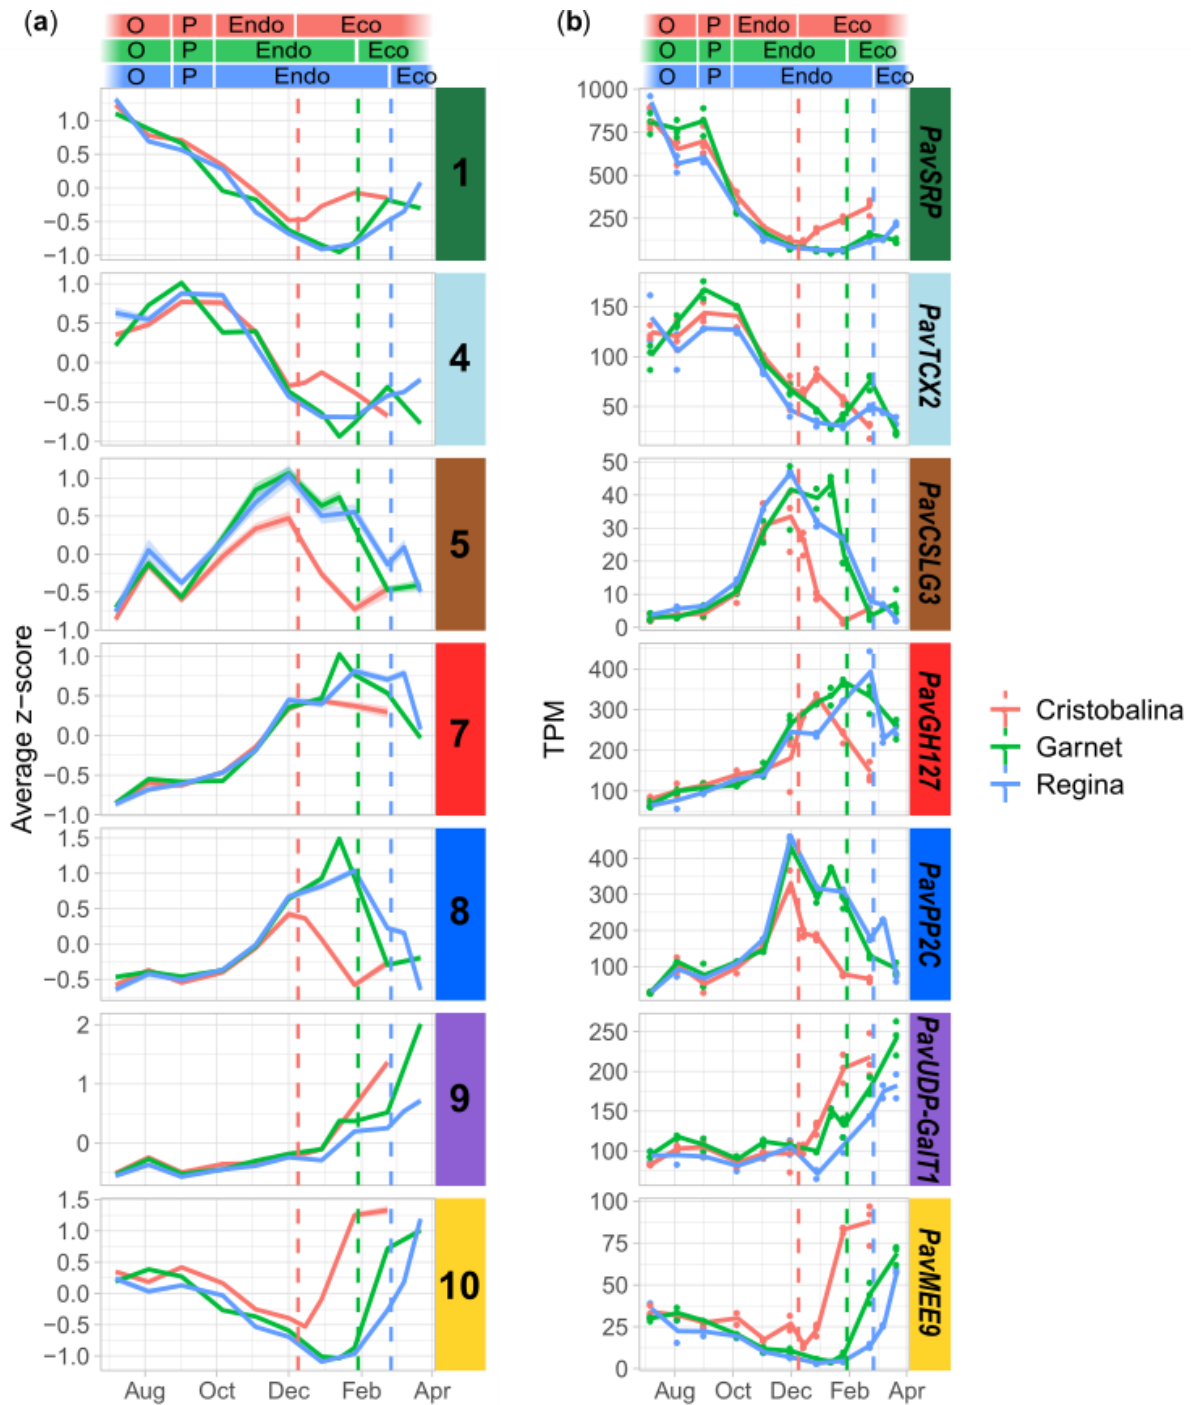

**Fig. 6 Expression patterns in the selected seven clusters for the three cultivars**

Expression patterns were analysed from August to March, covering bud organogenesis (O), paradormancy (P), endodormancy, and ecodormancy. Dash lines represent the estimated date of dormancy breaking, in red for ‘Cristobalina’, green for ‘Garnet’ and blue for ‘Regina’. (a) Average z-score patterns, calculated from the TPM, for the genes belonging to the seven selected clusters and (b) TPM for the seven marker genes from clusters 1, 4, 5, 7, 8, 9 and 10. Lines represent the average TPM, dots are the actual values. *SRP*: *STRESS RESPONSIVE PROTEIN*; *TCX2*: *TESMIN/TSO1-like CXC 2*; *CSLG3*: *Cellulose Synthase like G3*; *GH127*: *Glycosyl Hydrolase 127*; *PP2C*: *Phosphatase 2C*; *UDP-GalT1*: *UDP-Galactose transporter 1*; *MEE9*: *maternal effect embryo arrest 9*.

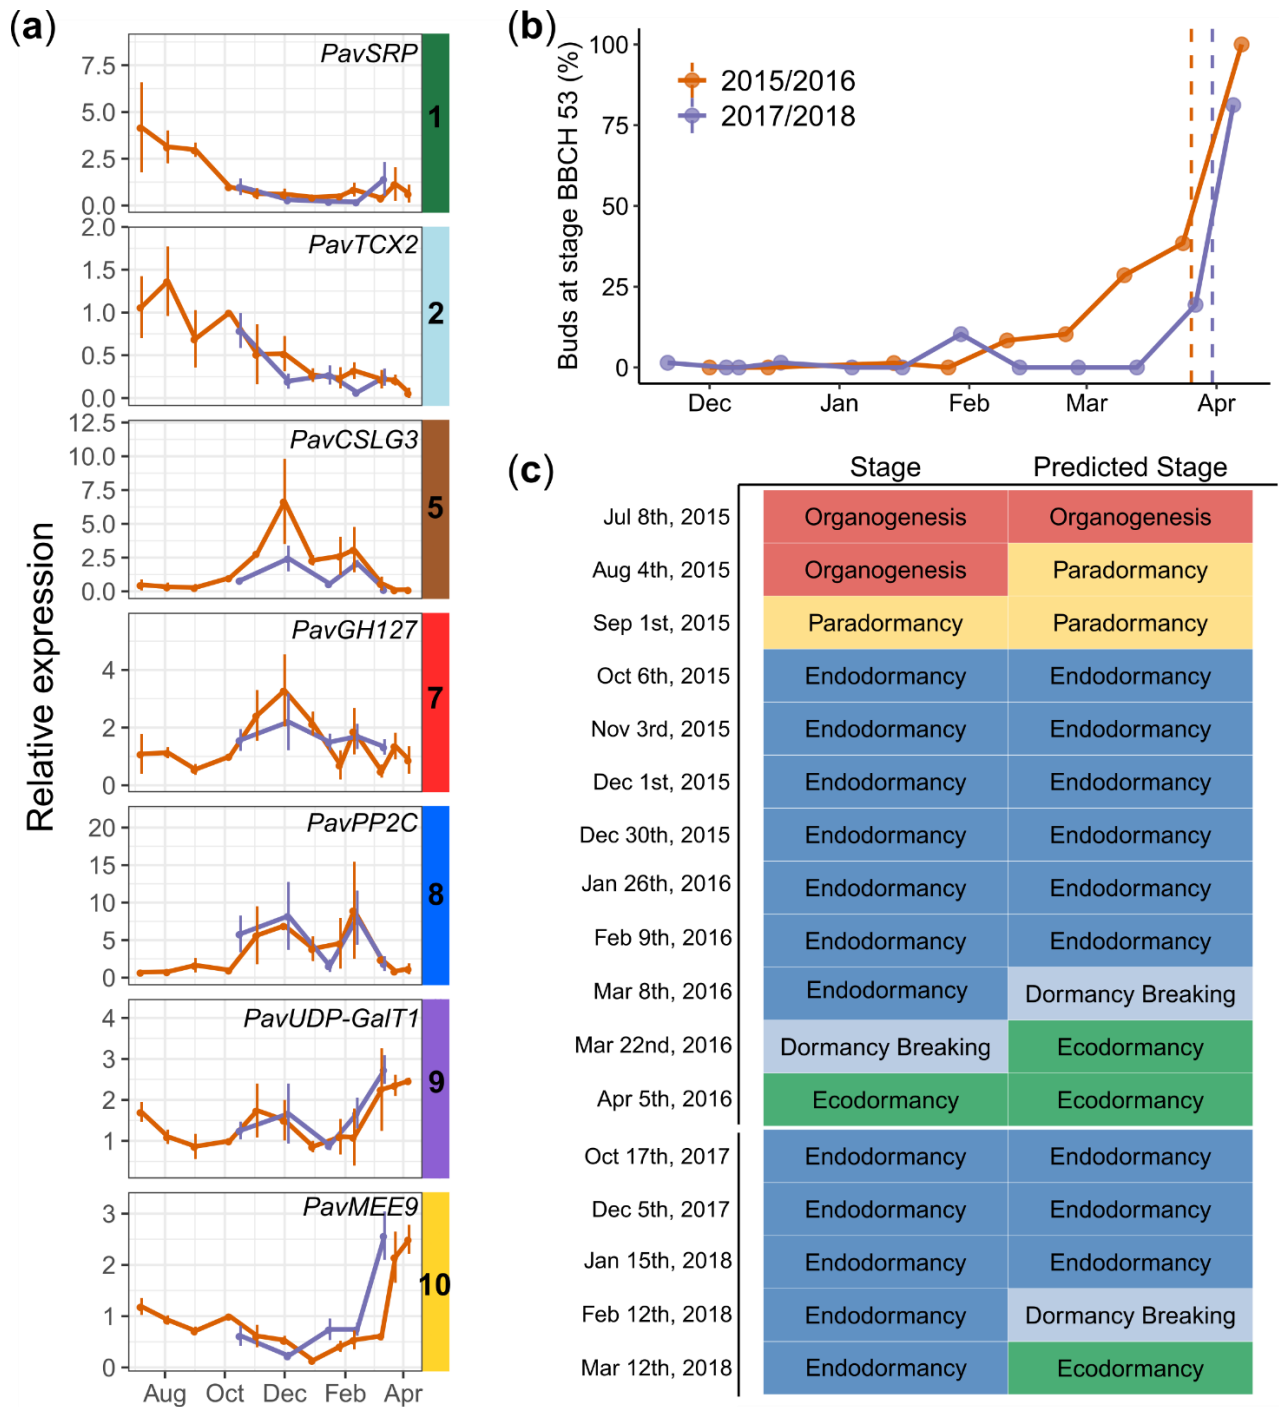

**Fig. 7 Expression for the seven marker genes allows accurate prediction of the bud dormancy stages in the late flowering cultivar ‘Fertard’ during two bud dormancy cycles**

(a) Relative expressions were obtained by qRT-PCR and normalized by the expression of two reference constitutively expressed genes *PavRPII* and *PavEF1*. (b) Evaluation of the dormancy status in ‘Fertard’ flower buds during the two seasons using the percentage of open flower buds (BBCH stage 53). (c) Predicted vs experimentally estimated bud stages. *SRP*: STRESS RESPONSIVE PROTEIN; *TCX2*: TESMIN/TSO1-like CXC 2; *CSLG3*: Cellulose Synthase like G3; *GH127*: Glycosyl Hydrolase 127; *PP2C*: Phosphatase 2C; *UDP-GalT1*: UDP-Galactose transporter 1; *MEE9*: maternal effect embryo arrest 9.



## 364 **Flower bud stage can be predicted using a small set of marker genes**

365 We have shown that flower buds in organogenesis, paradormancy, endodormancy and  
366 ecodormancy are characterised by specific transcriptional states. In theory, we could therefore use  
367 transcriptional data to infer the flower bud stage. For this, we selected seven marker genes, for clusters  
368 1, 4, 5, 7, 8, 9 and 10, that best represent the average expression profiles of their cluster (Fig. 6).  
369 Expression for these marker genes not only recapitulates the average profile of the cluster they  
370 originate from, but also temporal shifts in the profiles between the three cultivars (Fig. 6b). In order to  
371 define if these genes encompass as much information as the full transcriptome, or all DEGs, we  
372 performed a PCA of all samples harvested for all three cultivars using expression levels of these seven  
373 markers (Fig. S7). The clustering of samples along the two main axes of the PCA using these seven  
374 markers is very similar, if not almost identical, to the PCA results obtained using expression for all  
375 DEGs (Fig. 5). This indicates that the transcriptomic data can be reduced to only seven genes and still  
376 provides accurate information about the flower bud stages.

377 To test if these seven markers can be used to define the flower bud stage, we used a multinomial  
378 logistic regression modelling approach to predict the flower bud stage in our dataset based on the  
379 expression levels for these seven genes (Fig. 7 and Table S5). We obtain a very high model accuracy  
380 (90%) when the training and testing sets are randomly picked. The model also shows a high accuracy  
381 (82 to 87%) when predicting the bud stage of samples from the ‘Garnet’ or ‘Regina’ cultivars and  
382 trained on the two other cultivars (Table S5). These results indicate that the bud stage can be accurately  
383 predicted based on expression data by just using seven genes. In order to go further and test our model  
384 in an independent experiment, we analysed expression for the seven marker genes by RT-qPCR on  
385 buds sampled from another sweet cherry tree cultivar ‘Fertard’ for two consecutive years (Fig. 7a). We  
386 find a high accuracy of 71% for our model, trained on our data for all three cultivars ‘Regina’, ‘Garnet’  
387 and ‘Cristobalina’, to predict the flower bud stage for the ‘Fertard’ cultivar (Fig. 7c). In particular, the  
388 chronology of bud stages was very well predicted. This result indicates that these seven genes can be  
389 used as a diagnostic tool in order to infer the flower bud stage in sweet cherry trees.

390

## 391 **Discussion**

392

393 In this work, we have characterised transcriptional changes at a genome-wide scale happening  
394 throughout cherry tree flower bud dormancy, from organogenesis to the end of dormancy. To do this,  
395 we have analysed expression in flower buds at 11 dates from July 2015 to March 2016 for three  
396 cultivars displaying different dates of dormancy release, generating 82 transcriptomes in total. This  
397 resource, with a fine time resolution, reveals key aspects of the regulation of cherry tree flower buds

398 during dormancy (Fig. 8). We have shown that buds in organogenesis, paradormancy, endodormancy  
 399 and ecodormancy are characterised by distinct transcriptional states (Fig. 2, 3) and we highlighted the  
 400 different pathways activated during the main cherry tree flower bud dormancy stages (Fig. 4 and Table  
 401 1). Finally, we found that just seven genes are enough to accurately predict the main cherry tree flower  
 402 bud dormancy stages (Fig. 6, 7).

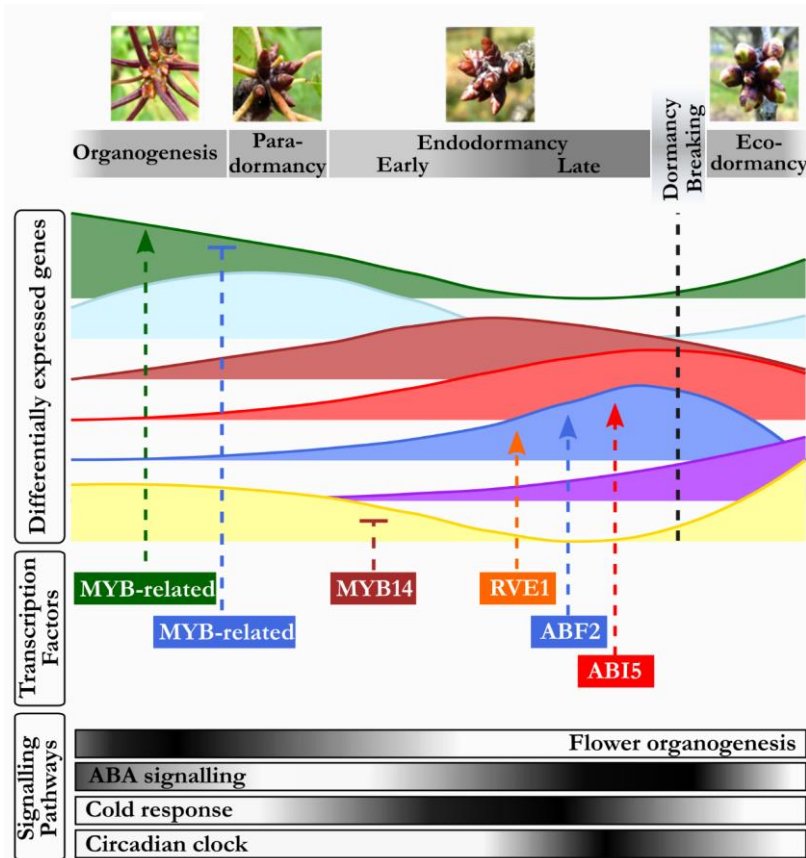

**Figure 8. From bud formation to flowering: transcriptomic regulation of flower bud dormancy**

Our results highlighted seven main expression patterns corresponding to the main dormancy stages. During organogenesis and paradormancy (July to September), signalling pathways associated with flower organogenesis and ABA signalling are upregulated. Distinct groups of genes are activated during different phases of endodormancy, including targets of transcription factors involved in ABA signalling, cold response and circadian clock.

403

#### 404 **Global lessons from transcriptomic data on the definition of flower bud dormancy stages**

405 Our results show that buds in organogenesis, paradormancy, endodormancy and ecodormancy  
 406 are characterised by distinct transcriptional states. This result is further supported by the fact that we  
 407 detected different groups of genes that are specifically expressed at these bud stages (Fig. 3).  
 408 Specifically, we found that the transcriptional states of flower buds during endodormancy and  
 409 ecodormancy are very different, indicating that different pathways are involved in these two types of  
 410 dormancy. This is further supporting previous observations that buds remain in endodormancy and  
 411 ecodormancy states under the control of different regulation pathways. Indeed, ecodormancy is under  
 412 the control of external signals and can therefore be reversed by exposure to growth-promotive signals  
 413 (Lang *et al.*, 1987). On the opposite, endogenous signals control endodormancy onset and maintenance  
 414 and a complex array of signalling pathways seem to be involved in the response to cold temperatures

415 that subsequently leads to dormancy breaking (see for example (Ophir *et al.*, 2009; Horvath, 2009;  
416 Considine & Considine, 2016; Singh *et al.*, 2016; Lloret *et al.*, 2018; Falavigna *et al.*, 2019).

417 Another interesting observation is the fact that samples harvested during endodormancy can be  
418 separated into two groups based on their transcriptional state: early endodormancy (October and  
419 November), and late endodormancy (from December to dormancy breaking). These two groups of  
420 samples are forming two distinct clusters in the PCA (Fig. 5), and are associated with different groups  
421 of expressed genes. These results indicate that endodormancy could potentially be separated into two  
422 periods: early and late endodormancy. However, we have to keep in mind that cold temperatures,  
423 below 10°C, only started at the end of November. It is thus difficult to discriminate between  
424 transcriptional changes associated with a difference in the bud stage during endodormancy, an effect  
425 of the pronounced change in temperatures, or a combination of both. Alternative experiments under  
426 controlled environments, similarly to studies conducted on hybrid aspen for example (Ruttink *et al.*,  
427 2007), could improve our knowledge on the different levels of endodormancy.

428 We also show that we can accurately predict the different bud stages using expression levels  
429 for only seven marker genes (Fig. 7). This suggests that the definition of the different bud stages based  
430 on physiological observation is consistent with transcriptomic profiles. However, we could detect  
431 substantial discrepancies suggesting that the definition of the bud stages can be improved. Indeed, we  
432 observe that samples harvested from buds during phases that we defined as organogenesis and  
433 paradormancy cluster together in the PCA, but away from samples harvested during endodormancy.  
434 Moreover, most of the genes highly expressed during paradormancy are also highly expressed during  
435 organogenesis. This is further supported by the fact that paradormancy is a flower bud stage predicted  
436 with less accuracy based on expression level of the seven marker genes. In details, paradormancy is  
437 defined as a stage of growth inhibition originating from surrounding organs (Lang *et al.*, 1987)  
438 therefore it is strongly dependant on the position of the buds within the tree and the branch. Our results  
439 suggest that defining paradormancy for multiple cherry flower buds based on transcriptomic data is  
440 difficult and even raise the question of whether paradormancy can be considered as a specific flower  
441 bud stage. Alternatively, we propose that the pre-dormancy period should rather be defined as a  
442 continuum between organogenesis, growth and/or growth cessation phases. Further physiological  
443 observations, including flower primordia developmental context (Fadón *et al.*, 2015), could provide  
444 crucial information to precisely link the transcriptomic environment to these bud stages.

445

446 **Highlight on main functions enriched during dormancy: organogenesis, response to cold, to ABA**  
447 **and to the circadian clock**

448 We determined different functions and pathways enriched during flower bud organogenesis,  
449 paradormancy, endodormancy and ecodormancy. We notably observe an enrichment for GO involved  
450 in the response to abiotic and biotic responses, as well as an enrichment for targets of many TFs  
451 involved in the response to environmental factors. In particular, our results suggest that *PavMYB14*,  
452 which has a peak of expression in November just before the cold period starts, is repressing genes that  
453 are expressed during ecodormancy. This is in agreement with the fact that *AtMYB14*, the *PavMYB14*  
454 homolog in *Arabidopsis thaliana*, is involved in cold stress response regulation (Chen *et al.*, 2013).  
455 Although these results were not confirmed in *Populus* (Howe *et al.*, 2015), two MYB DOMAIN  
456 PROTEIN genes (*MYB4* and *MYB14*) were up-regulated during the induction phase of dormancy in  
457 grapevine (Fennell *et al.*, 2015). Similarly, we identified an enrichment in target motifs for a  
458 transcription factor belonging to the C-REPEAT/DRE BINDING FACTOR 2/DEHYDRATION  
459 RESPONSE ELEMENT-BINDING PROTEIN (CBF/DREB) family in genes highly expressed during  
460 endodormancy. These TFs have previously been implicated in cold acclimation and endodormancy in  
461 several perennial species (Doğramaci *et al.*, 2010; Leida *et al.*, 2012). These results are in agreement  
462 with the previous observation showing that genes responding to cold are differentially expressed  
463 during dormancy in other tree species (Ueno *et al.*, 2013). Interestingly, we also identified an  
464 enrichment in targets for four TFs involved in ABA-dependent signalling. First, *PavWRKY40* is mostly  
465 expressed during organogenesis, and its expression profile is very similar to the one of its target genes.  
466 Several studies have highlighted a role of *PavWRKY40* homolog in *Arabidopsis* in ABA signalling, in  
467 relation with light transduction (Liu *et al.*, 2013; Geilen & Böhmer, 2015) and biotic stresses (Pandey  
468 *et al.*, 2010). On the other hand, *PavABI5* and *PavABF2* are mainly expressed around the time of  
469 dormancy release, like their target, and their homologs in *Arabidopsis* are involved in key ABA  
470 processes, especially during seed dormancy (Lopez-Molina *et al.*, 2002). These results are further  
471 confirmed by the enrichment of GO terms related to ABA pathway found in the genes highly expressed  
472 during endodormancy. Our observations suggest that genes potentially linked to ABA signalling are  
473 expressed either during organogenesis or during dormancy release. These results are supported by  
474 previous reports where genes involved in ABA signalling are differentially expressed during dormancy  
475 in other tree species (Ruttink *et al.*, 2007; Ueno *et al.*, 2013; Zhong *et al.*, 2013; Khalil-Ur-Rehman *et al.*,  
476 2017; Zhang *et al.*, 2018). It has also been shown that genes involved in other phytohormones  
477 pathways, including auxin, ethylene, gibberellin and jasmonic acid, are differentially expressed  
478 between bud stages in other perennial species (Zhong *et al.*, 2013; Khalil-Ur-Rehman *et al.*, 2017).  
479 This is in agreement with our observation of an enrichment for GO terms for the response to jasmonic  
480 acid, and of targets of TFs involved in the response to ethylene, in genes specifically expressed at  
481 different flower bud stages.

482 In addition, we also identified an enrichment of targets for *PavRVE8* and *PavRVE1* among the genes  
483 expressed around the time of dormancy release. These TFs are homologs of Arabidopsis MYB  
484 transcription factors involved in the circadian clock. In particular, *AtRVE1* seems to integrate several  
485 signalling pathways including cold acclimation and auxin (Rawat *et al.*, 2009; Meissner *et al.*, 2013;  
486 Jiang *et al.*, 2016) while *AtRVE8* is involved in the regulation of circadian clock by modulating the  
487 pattern of H3 acetylation (Farinas & Mas, 2011). Our findings that genes involved in the circadian  
488 clock are expressed and potentially regulate genes at the time of dormancy release are in agreement  
489 with previous work indicating a role of the circadian clock in dormancy in poplar (Ibáñez *et al.*, 2010).  
490 To our knowledge, this is the first report on the transcriptional regulation of early stages of flower bud  
491 development. We highlighted the upregulation of several pathways linked to organogenesis during the  
492 summer months, including *PavMYB63* and *PavMYB93*, expressed during early organogenesis, along  
493 their targets, with potential roles in the secondary wall formation (Zhou *et al.*, 2009) and root  
494 development (Gibbs *et al.*, 2014).

495

#### 496 **Development of a diagnostic tool to define the flower bud dormancy stage using seven genes**

497

498 We find that sweet cherry flower bud stage can be accurately predicted with the expression of  
499 just seven genes. It indicates that combining expression profiles of just seven genes is enough to  
500 recapitulate all transcriptional states in our study. This is in agreement with previous work showing  
501 that transcriptomic states can be accurately predicted using a relatively low number of markers (Biswas  
502 *et al.*, 2017). Interestingly, when there are discrepancies between the predicted bud stages and the ones  
503 defined by physiological observations, the model always predicts that stages happen earlier than the  
504 actual observations. For example, the model predicts that dormancy breaking occurs instead of  
505 endodormancy, or ecodormancy instead of dormancy breaking. This could suggest that transcriptional  
506 changes happen before we can observe physiological changes. This is indeed consistent with the  
507 indirect phenotyping method currently used, based on the observation of the response to growth-  
508 inducible conditions after ten days. Using these seven genes to predict the flower bud stage would thus  
509 potentially allow to identify these important transitions when they actually happen.

510 We also show that the expression level of these seven genes can be used to predict the flower bud stage  
511 in other conditions by performing RT-qPCR. This independent experiment has also been done on two  
512 consecutive years and shows that RT-qPCR for these seven marker genes as well as two control genes  
513 are enough to predict the flower bud stage in cherry trees. It shows that performing a full transcriptomic  
514 analysis is not necessary if the only aim is to define the dormancy stage of flower buds. This would  
515 offer an alternative approach to methods currently used such as assessing the date of dormancy release

516 by using forcing conditions. In addition, this result sets the stage for the development of a fast and cost  
517 effective diagnostic tool to molecularly define the flower bud state in cherry trees. Such diagnostic  
518 tool would be very valuable for researchers working on cherry trees as well as for plant growers,  
519 notably to define the best time for the application of dormancy breaking agents, whose efficiency  
520 highly depends on the state of dormancy progression.

521

## 522 **Acknowledgments**

523 We thank the Fruit Experimental Unit of INRA (Bordeaux-France) for growing and managing the  
524 trees, and Teresa Barreneche, Lydie Fouilhaux, Jacques Joly, H el ene Christman and R emi Beauvieux  
525 for the help during the harvest and for the pictures. Many thanks to Dr Varodom Charoensawan  
526 (Mahidol University, Thailand) for providing scripts for mapping and gene expression count  
527 extraction. The PhD of Noemie Vimont was supported by a CIFRE grant funded by the Roullier Group  
528 (St Malo-France) and ANRT (France).

529

## 530 **Author contributions**

531 SC, BW, ED and PAW designed the original research. MA and JCY participated to the project design.  
532 NV performed the RNA-seq and analysed the RNA-seq with CS and BW. MF performed the RT-  
533 qPCR. JAC performed the TF and motifs enrichment analysis. MT developed the model. NV, SC and  
534 BW wrote the article with the assistance of all the authors.

535

## 536 **References**

- 537 **Alexa A, Rahnenf uhrer J. 2018.** topGO: Enrichment Analysis for Gene Ontology. *R package*  
538 *version 2.34.0.*
- 539 **Allona I, Ramos A, Iba nez C, Contreras A, Casado R, Aragoncillo C. 2008.** Review. Molecular  
540 control of winter dormancy establishment in trees. *Spanish Journal of Agricultural Research* **6**: 201–  
541 210.
- 542 **Atkinson CJ, Brennan RM, Jones HG. 2013.** Declining chilling and its impact on temperate  
543 perennial crops. *Environmental and Experimental Botany* **91**: 48–62.
- 544 **Badeck FW, Bondeau A, B ottcher K, Doktor D, Lucht W, Schaber JJ, Sitch S, Bottcher K.**  
545 **2004.** Responses of spring phenology to climate change. *New Phytologist* **162**: 295–309.
- 546 **Beauvieux R, Wenden B, Dirlewanger E. 2018.** Bud Dormancy in Perennial Fruit Tree Species : A  
547 Pivotal Role for Oxidative Cues. *Frontiers in Plant Science* **9**: 1–13.
- 548 **Benjamini Y, Hochberg J. 1995.** Controlling the false discovery rate: a practical and powerful  
549 approach to multiple testing. *Journal of the Royal Statistical Society. Series B (Methodological)* **57**:

550 289–300.

551 **Bigler C, Bugmann H. 2018.** Climate-induced shifts in leaf unfolding and frost risk of European  
552 trees and shrubs. *Scientific Reports* **8**: 1–10.

553 **Biswas S, Kerner K, Teixeira PJPL, Dangl JL, Jojic V, Wigge PA. 2017.** Tradict enables accurate  
554 prediction of eukaryotic transcriptional states from 100 marker genes. *Nature Communications* **8**.

555 **Bolger AM, Lohse M, Usadel B. 2014.** Trimmomatic: A flexible trimmer for Illumina sequence  
556 data. *Bioinformatics* **30**: 2114–2120.

557 **Campoy JA, Ruiz D, Egea J. 2011.** Dormancy in temperate fruit trees in a global warming context:  
558 A review. *Scientia Horticulturae* **130**: 357–372.

559 **Causier B, Schwarz-Sommer Z, Davies B. 2010.** Floral organ identity: 20 years of ABCs.  
560 *Seminars in Cell and Developmental Biology* **21**: 73–79.

561 **Chao WS, Dođramaci M, Horvath DP, Anderson J V., Foley ME. 2017.** Comparison of  
562 phytohormone levels and transcript profiles during seasonal dormancy transitions in underground  
563 adventitious buds of leafy spurge. *Plant Molecular Biology* **94**: 281–302.

564 **Chen Y, Chen Z, Kang J, Kang D, Gu H, Qin G. 2013.** AtMYB14 Regulates Cold Tolerance in  
565 Arabidopsis. *Plant Molecular Biology Reporter* **31**: 87–97.

566 **Cline MG, Deppong DO. 1999.** The role of apical dominance in paradormancy of temperate woody  
567 plants: A reappraisal. *Journal of Plant Physiology* **155**: 350–356.

568 **Considine MJ, Considine JA. 2016.** On the language and physiology of dormancy and quiescence  
569 in plants. *Journal of Experimental Botany* **67**: 3189–3203.

570 **Cooke JE, Eriksson ME, Junttila O. 2012.** The dynamic nature of bud dormancy in trees:  
571 environmental control and molecular mechanisms. *Plant Cell Environ* **35**: 1707–1728.

572 **Dođramaci M, Horvath DP, Chao WS, Foley ME, Christoffers MJ, Anderson J V. 2010.** Low  
573 temperatures impact dormancy status, flowering competence, and transcript profiles in crown buds of  
574 leafy spurge. *Plant Molecular Biology* **73**: 207–226.

575 **Dođramaci M, Horvath DP, Anderson JV. 2014.** Dehydration-induced endodormancy in crown  
576 buds of leafy spurge highlights involvement of MAF3- and RVE1-like homologs, and hormone  
577 signaling cross-talk. *Plant Molecular Biology* **86**: 409–424.

578 **Erez A. 2000.** Bud Dormancy; Phenomenon, Problems and Solutions in the Tropics and Subtropics.  
579 In: Temperate Fruit Crops in Warm Climates. 17–48.

580 **Fadón E, Herrero M, Rodrigo J. 2015.** Flower development in sweet cherry framed in the BBCH  
581 scale. *Scientia Horticulturae* **192**: 141–147.

582 **Falavigna V da S, Guitton B, Costes E, Andrés F. 2019.** I Want to (Bud) Break Free: The  
583 Potential Role of DAM and SVP-Like Genes in Regulating Dormancy Cycle in Temperate Fruit

- 584 Trees. *Frontiers in Plant Science* **9**: 1–17.
- 585 **Farinas B, Mas P. 2011.** Histone acetylation and the circadian clock: A role for the MYB  
586 transcription factor RVE8/LCL5. *Plant Signaling and Behavior* **6**: 541–543.
- 587 **Fennell AY, Schlauch KA, Gouthu S, Deluc LG, Khadka V, Sreekantan L, Grimplet J, Cramer**  
588 **GR, Mathiason KL. 2015.** Short day transcriptomic programming during induction of dormancy in  
589 grapevine. *Frontiers in Plant Science* **6**: 834.
- 590 **Franklin KA, Lee SH, Patel D, Kumar SV, Spartz AK, Gu C, Ye S, Yu P, Breen G, Cohen JD,**  
591 **et al. 2011.** PHYTOCHROME-INTERACTING FACTOR 4 (PIF4) regulates auxin biosynthesis at  
592 high temperature. *Proceedings of the National Academy of Sciences* **108**: 20231–20235.
- 593 **Fu YH, Zhao H, Piao S, Peaucelle M, Peng S, Zhou G, Ciais P, Huang M, Menzel A, Peñuelas**  
594 **J, et al. 2015.** Declining global warming effects on the phenology of spring leaf unfolding. *Nature*  
595 **526**: 104–107.
- 596 **Geilen K, Böhmer M. 2015.** Dynamic subnuclear relocalization of WRKY40, a potential new  
597 mechanism of ABA-dependent transcription factor regulation. *Plant signaling & behavior* **10**:  
598 e1106659.
- 599 **Gibbs DJ, Voß U, Harding SA, Fannon J, Moody LA, Yamada E, Swarup K, Nibau C, Bassel**  
600 **GW, Choudhary A, et al. 2014.** AtMYB93 is a novel negative regulator of lateral root development  
601 in Arabidopsis. *New Phytologist* **203**: 1194–1207.
- 602 **Grant CE, Bailey TL, Noble WS. 2011.** FIMO: Scanning for occurrences of a given motif.  
603 *Bioinformatics* **27**: 1017–1018.
- 604 **Heide OM. 2008.** Interaction of photoperiod and temperature in the control of growth and dormancy  
605 of *Prunus* species. *Scientia Horticulturae* **115**: 309–314.
- 606 **Heide OM, Prestrud AK. 2005.** Low temperature, but not photoperiod, controls growth cessation  
607 and dormancy induction and release in apple and pear. *Tree Physiol* **25**: 109–114.
- 608 **Horvath DP. 2009.** Common mechanisms regulate flowering and dormancy. *Plant Science* **177**:  
609 523–531.
- 610 **Howe GT, Horvath DP, Dharmawardhana P, Priest HD, Mockler TC, Strauss SH. 2015.**  
611 Extensive Transcriptome Changes During Natural Onset and Release of Vegetative Bud Dormancy  
612 in *Populus*. *Frontiers in plant science* **6**.
- 613 **Ibáñez C, Kozarewa I, Johansson M, Ogren E, Rohde A, Eriksson ME. 2010.** Circadian clock  
614 components regulate entry and affect exit of seasonal dormancy as well as winter hardiness in  
615 *Populus* trees. *Plant physiology* **153**: 1823–33.
- 616 **Jiang Z, Xu G, Jing Y, Tang W, Lin R. 2016.** Phytochrome B and REVEILLE1/2-mediated  
617 signalling controls seed dormancy and germination in Arabidopsis. *Nature Communications* **7**: 1–10.



- 618 **Jin J, Tian F, Yang DC, Meng YQ, Kong L, Luo J, Gao G. 2017.** PlantTFDB 4.0: Toward a  
619 central hub for transcription factors and regulatory interactions in plants. *Nucleic Acids Research* **45**:  
620 D1040–D1045.
- 621 **Khalil-Ur-Rehman M, Sun L, Li CX, Faheem M, Wang W, Tao JM. 2017.** Comparative RNA-  
622 seq based transcriptomic analysis of bud dormancy in grape. *BMC Plant Biology* **17**: 1–11.
- 623 **Kielbowicz-Matuk A. 2012.** Involvement of plant C2H2-type zinc finger transcription factors in  
624 stress responses. *Plant Science* **185–186**: 78–85.
- 625 **Koornneef M, Léon-Kloosterziel KM, Schwartz SH, Zeevaart JAD. 1998.** The genetic and  
626 molecular dissection of abscisic acid biosynthesis and signal transduction in Arabidopsis. *Plant*  
627 *Physiology and Biochemistry* **36**: 83–89.
- 628 **Kumar G, Rattan UK, Singh AK. 2016.** Chilling-mediated DNA methylation changes during  
629 dormancy and its release reveal the importance of epigenetic regulation during winter dormancy in  
630 Apple (*Malus x domestica* Borkh.). *PLoS ONE* **11**: 1–25.
- 631 **Lang G, Early J, Martin G, Darnell R. 1987.** Endo-, para-, and ecodormancy: physiological  
632 terminology and classification for dormancy research. *Hort Science* **22**: 371–377.
- 633 **Lee SJ, Kang JY, Park HJ, Kim MD, Bae MS, Choi H, Kim SY. 2010.** DREB2C Interacts with  
634 ABF2, a bZIP Protein Regulating Abscisic Acid-Responsive Gene Expression, and Its  
635 Overexpression Affects Abscisic Acid Sensitivity. *Plant Physiology* **153**: 716–727.
- 636 **Leida C, Conesa A, Llácer G, Badenes ML, Ríos G. 2012.** Histone modifications and expression  
637 of *DAM6* gene in peach are modulated during bud dormancy release in a cultivar-dependent manner.  
638 *New phytologist* **193**: 67–80.
- 639 **Lesur I, Le Provost G, Bento P, Da Silva C, Leplé JC, Murat F, Ueno S, Bartholomé J, Lalanne**  
640 **C, Ehrenmann F, et al. 2015.** The oak gene expression atlas: Insights into *Fagaceae* genome  
641 evolution and the discovery of genes regulated during bud dormancy release. *BMC Genomics* **16**:  
642 112.
- 643 **Liu Q, Wang Z, Xu X, Zhang H, Li C. 2015.** Genome-wide analysis of C2H2 zinc-finger family  
644 transcription factors and their responses to abiotic stresses in poplar (*Populus trichocarpa*). *PLoS*  
645 *ONE* **10**: 1–25.
- 646 **Liu R, Xu YH, Jiang SC, Lu K, Lu YF, Feng XJ, Wu Z, Liang S, Yu YT, Wang XF, et al. 2013.**  
647 Light-harvesting chlorophyll a/b-binding proteins, positively involved in abscisic acid signalling,  
648 require a transcription repressor, WRKY40, to balance their function. *Journal of Experimental*  
649 *Botany* **64**: 5443–5456.
- 650 **Lloret A, Badenes ML, Ríos G. 2018.** Modulation of Dormancy and Growth Responses in  
651 Reproductive Buds of Temperate Trees. *Frontiers in Plant Science* **9**: 1–12.

- 652 **Lopez-Molina L, Mongrand S, McLachlin DT, Chait BT, Chua NH. 2002.** ABI5 acts  
653 downstream of ABI3 to execute an ABA-dependent growth arrest during germination. *Plant Journal*  
654 **32:** 317–328.
- 655 **Love MI, Huber W, Anders S. 2014.** Moderated estimation of fold change and dispersion for RNA-  
656 seq data with DESeq2. *Genome Biology* **15:** 1–21.
- 657 **Maurya JP, Triozzi PM, Bhalerao RP, Perales M. 2018.** Environmentally Sensitive Molecular  
658 Switches Drive Poplar Phenology. *Frontiers in Plant Science* **9:** 1–8.
- 659 **Meier U. 2001.** *Growth stages of mono- and dicotyledonous plants BBCH Monograph.*
- 660 **Meissner M, Orsini E, Ruschhaupt M, Melchinger AE, Hinch DK, Heyer AG. 2013.** Mapping  
661 quantitative trait loci for freezing tolerance in a recombinant inbred line population of *Arabidopsis*  
662 *thaliana* accessions Tenela and C24 reveals REVEILLE1 as negative regulator of cold acclimation.  
663 *Plant, Cell and Environment* **36:** 1256–1267.
- 664 **Menzel A, Sparks TH, Estrella N, Koch E, Aasa A, Ahas R, Alm-Kübler K, Bissolli P,**  
665 **Braslavská O, Briede A, et al. 2006.** European phenological response to climate change matches the  
666 warming pattern. *Global Change Biology* **12:** 1969–1976.
- 667 **Min Z, Zhao X, Li R, Yang B, Liu M, Fang Y. 2017.** Comparative transcriptome analysis provides  
668 insight into differentially expressed genes related to bud dormancy in grapevine (*Vitis vinifera*).  
669 *Scientia Horticulturae* **225:** 213–220.
- 670 **Olsen JE. 2010.** Light and temperature sensing and signaling in induction of bud dormancy in  
671 woody plants. *Plant Molecular Biology* **73:** 37–47.
- 672 **Ophir R, Pang X, Halaly T, Venkateswari J, Lavee S, Galbraith D, Or E. 2009.** Gene-expression  
673 profiling of grape bud response to two alternative dormancy-release stimuli expose possible links  
674 between impaired mitochondrial activity, hypoxia, ethylene-ABA interplay and cell enlargement.  
675 *Plant Molecular Biology* **71:** 403–423.
- 676 **Pandey SP, Roccaro M, Schön M, Logemann E, Somssich IE. 2010.** Transcriptional  
677 reprogramming regulated by WRKY18 and WRKY40 facilitates powdery mildew infection of  
678 *Arabidopsis*. *Plant Journal* **64:** 912–923.
- 679 **Paul A, Jha A, Bhardwaj S, Singh S, Shankar R, Kumar S. 2014.** RNA-seq-mediated  
680 transcriptome analysis of actively growing and winter dormant shoots identifies non-deciduous habit  
681 of evergreen tree tea during winters. *Scientific Reports* **4:** 1–9.
- 682 **Penfield S, Josse EM, Kannangara R, Gilday AD, Halliday KJ, Graham IA. 2005.** Cold and  
683 light control seed germination through the bHLH transcription factor SPATULA. *Current Biology*  
684 **15:** 1998–2006.
- 685 **Rawat R, Schwartz J, Jones MA, Sairanen I, Cheng Y, Andersson CR, Zhao Y, Ljung K,**

- 686 **Harmer SL. 2009.** REVEILLE1, a Myb-like transcription factor, integrates the circadian clock and  
687 auxin pathways. *Proceedings of the National Academy of Sciences* **106**: 16883–16888.
- 688 **Ripley B, Venables W. 2016.** R package ‘nnet’. *R package version 7.3*.
- 689 **Ruttink T, Arend M, Morreel K, Storme V, Rombauts S, Fromm J, Bhalerao RP, Boerjan W,**  
690 **Rohde A. 2007.** A molecular timetable for apical bud formation and dormancy induction in poplar.  
691 *Plant Cell* **19**: 2370–2390.
- 692 **Singh RK, Svystun T, AIDahmash B, Jönsson AM, Bhalerao RP. 2016.** Photoperiod- and  
693 temperature-mediated control of growth cessation and dormancy in trees: A molecular perspective.  
694 *New Phytologist*.
- 695 **Snyder RL, de Melo-abreu JP. 2005.** *Frost Protection : fundamentals , practice and economics*.  
696 Rome.
- 697 **Takemura Y, Kuroki K, Shida Y, Araki S, Takeuchi Y, Tanaka K, Ishige T, Yajima S, Tamura**  
698 **F. 2015.** Comparative transcriptome analysis of the less-dormant taiwanese pear and the dormant  
699 Japanese pear during winter season. *PLoS ONE* **10**.
- 700 **Trapnell C, Pachter L, Salzberg SL. 2009.** TopHat: Discovering splice junctions with RNA-Seq.  
701 *Bioinformatics* **25**: 1105–1111.
- 702 **Ueno S, Klopp C, Leplé JC, Derory J, Noirot C, Léger V, Prince E, Kremer A, Plomion C, Le**  
703 **Provost G. 2013.** Transcriptional profiling of bud dormancy induction and release in oak by next-  
704 generation sequencing. *BMC Genomics* **14**: 236.
- 705 **Verde I, Jenkins J, Dondini L, Micali S, Pagliarani G, Vendramin E, Paris R, Aramini V, Gaza**  
706 **L, Rossini L, et al. 2017.** The Peach v2.0 release: high-resolution linkage mapping and deep  
707 resequencing improve chromosome-scale assembly and contiguity. *BMC Genomics* **18**: 225.
- 708 **Vitasse Y, Lenz A, Körner C. 2014.** The interaction between freezing tolerance and phenology in  
709 temperate deciduous trees. *Frontiers in Plant Science* **5**: 541.
- 710 **Wagner D. 2003.** Chromatin regulation of plant development. *Current Opinion in Plant Biology* **6**:  
711 20–28.
- 712 **Wenden B, Campoy J, Jensen M, López-Ortega G. 2017.** Climatic Limiting Factors:  
713 Temperature. In: Quero-García J, Iezzoni A, Pulawska J, Lang G, eds. *Cherries: Botany, Production*  
714 *and Uses*. CABI Publishing, 166–188.
- 715 **Zhang Z, Zhuo X, Zhao K, Zheng T, Han Y, Yuan C, Zhang Q. 2018.** Transcriptome Profiles  
716 Reveal the Crucial Roles of Hormone and Sugar in the Bud Dormancy of *Prunus mume*. *Scientific*  
717 *Reports* **8**: 1–15.
- 718 **Zhong W, Gao Z, Zhuang W, Shi T, Zhang Z, Ni Z. 2013.** Genome-wide expression profiles of  
719 seasonal bud dormancy at four critical stages in Japanese apricot. *Plant molecular biology* **83**: 247–

720 64.

721 **Zhou J, Lee C, Zhong R, Ye Z-H. 2009.** MYB58 and MYB63 Are Transcriptional Activators of the  
722 Lignin Biosynthetic Pathway during Secondary Cell Wall Formation in Arabidopsis. *the Plant Cell*  
723 *Online* **21**: 248–266.

724 **Zhu Y, Li Y, Xin D, Chen W, Shao X, Wang Y, Guo W. 2015.** RNA-Seq-based transcriptome  
725 analysis of dormant flower buds of Chinese cherry (*Prunus pseudocerasus*). *Gene* **555**: 362–376.

726

### 727 **Supporting information**

728 Graphical web interface DorPatterns: <http://bwenden.shinyapps.io/DorPatterns>

729 **Fig. S1** Field temperature during the sampling season

730 **Fig. S2** Separation of samples by dormancy stage using read counts for all genes

731 **Fig. S3** Enrichments in gene ontology terms in the ten clusters

732 **Fig. S4** Expression patterns for the transcription factors and their targets

733 **Fig. S5** Separation of samples by dormancy stage and cultivar using all genes

734 **Fig. S6** Clusters of expression patterns for differentially expressed genes in the sweet cherry cultivars  
735 ‘Regina’, ‘Cristobalina’ and ‘Garnet’

736 **Fig. S7** Separation of samples by dormancy stage and cultivar using the seven marker genes

737

738 **Table S1** Description of the flower bud samples used for RNA-seq and qRT-PCR

739 **Table S2** RNA-seq mapped reads and gene count information

740 **Table S3** ‘Garnet’ differentially expressed genes and their assigned clusters.

741 **Table S4** Transcription factors with motif enrichment in the clusters.

742 **Table S5** Model information for the different modelling assays corresponding to different training and  
743 testing sets.
